# Supplementary material
Source: Springer Nature journal article supplement (https://www.springermedizin.de/resource/supplementary/12888_2013_1629_MOESM4_ESM.pdf/9481004)

## Positive Signal and Negative Noise Condition

---

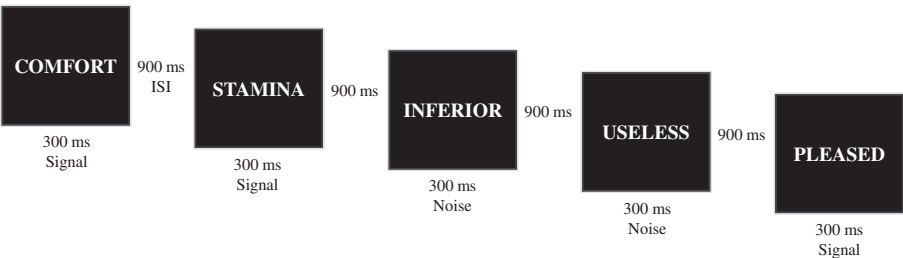

## Positive Signal and Neutral Noise Condition

---

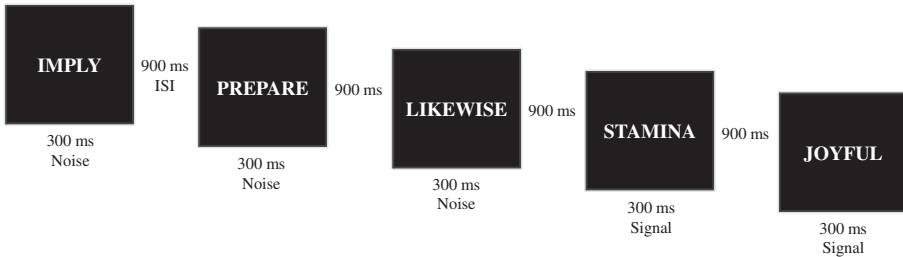

Supplement: MOESM4 [file 9481004]
